# Supplementary material
Source: MDPI journal article supplement (https://www.mdpi.com/2071-1050/10/10/3428)
Supplement: s1 [file s1 › Figure S1.pdf]

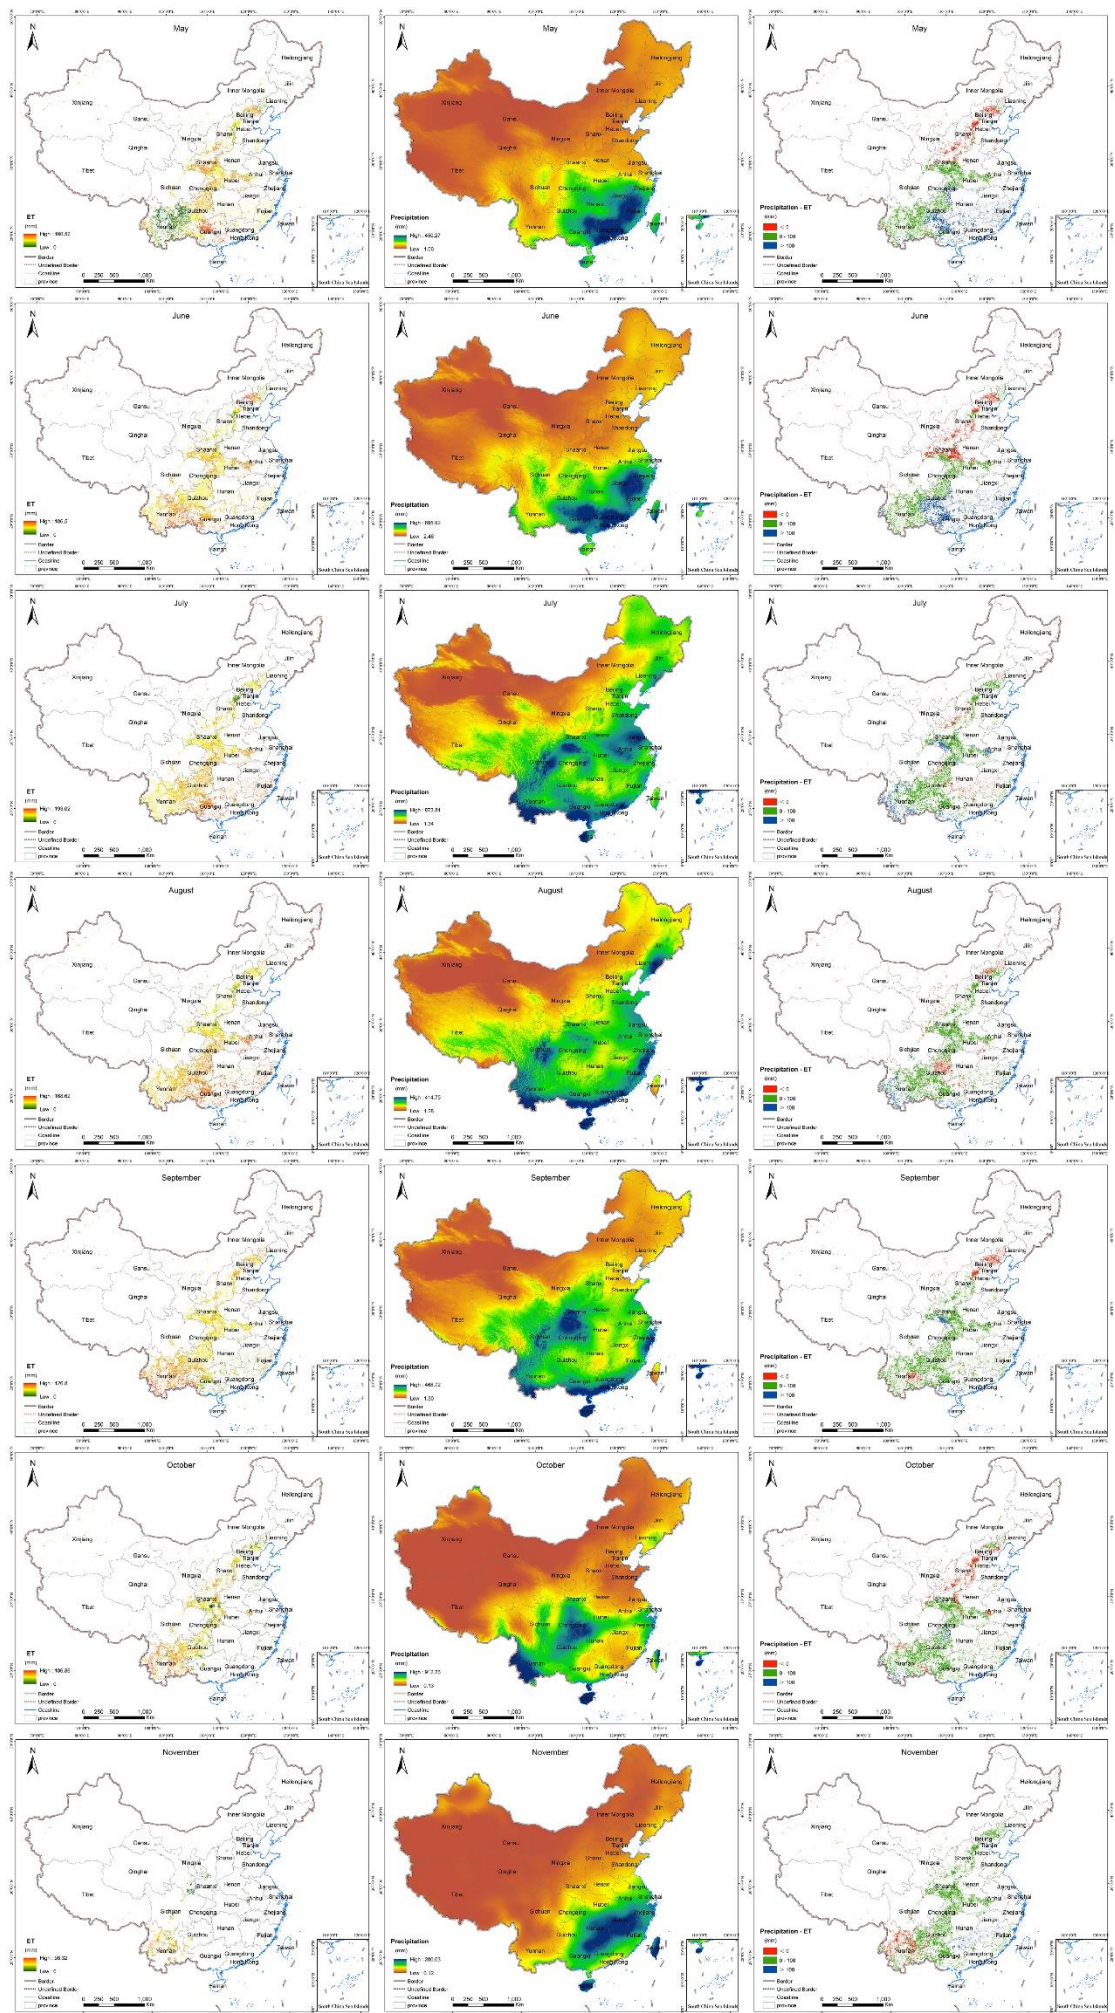

**Figure S1.** The difference between precipitation and water demand for sweet sorghum. The figures in the right column indicate the ET of sweet sorghum during growth from May to December. The figures in the middle column are the precipitation in each month. The figures on the left represent the difference between precipitation and ET of sweet sorghum in each pixel.
