# Supplementary material
Source: MDPI journal article supplement (https://www.mdpi.com/2071-1050/10/10/3428)
Supplement: s1 [file s1 › Table S1.pdf]

Table S1. The relationship between the gross amount of water resources, water consumption and water demand for developing sweet sorghum-based fuel ethanol in each province.

| Province       | Water consumption<br>(million m <sup>3</sup> ) | The ET of sweet<br>sorghum (million m <sup>3</sup> ) | Gross amount of water<br>resources (million m <sup>3</sup> ) |
|----------------|------------------------------------------------|------------------------------------------------------|--------------------------------------------------------------|
| Anhui          | 29070                                          | 3183                                                 | 124520                                                       |
| Beijing        | 3880                                           | 409                                                  | 3510                                                         |
| Fujian         | 18910                                          | 5925                                                 | 210900                                                       |
| Gansu          | 11840                                          | 3607                                                 | 16840                                                        |
| Guangdong      | 43500                                          | 4024                                                 | 245860                                                       |
| Guangxi        | 29060                                          | 23204                                                | 217860                                                       |
| Guizhou        | 10030                                          | 31325                                                | 106610                                                       |
| Hainan         | 4500                                           | 385                                                  | 48990                                                        |
| Hebei          | 18260                                          | 12465                                                | 20830                                                        |
| Henan          | 22760                                          | 1601                                                 | 33730                                                        |
| Heilongjiang   | 35260                                          | 889                                                  | 84370                                                        |
| Hubei          | 28200                                          | 24551                                                | 149800                                                       |
| Hunan          | 33040                                          | 3420                                                 | 219660                                                       |
| Jilin          | 13250                                          | 143                                                  | 48880                                                        |
| Jiangsu        | 57740                                          | 121                                                  | 74170                                                        |
| Jiangxi        | 24540                                          | 2059                                                 | 222110                                                       |
| Liaoning       | 13540                                          | 2530                                                 | 33160                                                        |
| Inner Mongolia | 19030                                          | 1221                                                 | 42650                                                        |
| Ningxia        | 6490                                           | 35                                                   | 960                                                          |
| Shandong       | 21400                                          | 2207                                                 | 22030                                                        |
| Shanxi         | 7550                                           | 8020                                                 | 13410                                                        |
| Shaanxi        | 9080                                           | 23777                                                | 27150                                                        |
| Sichuan        | 26730                                          | 7706                                                 | 234090                                                       |
| Tianjin        | 2720                                           | 20                                                   | 1890                                                         |
| Tibet          | 3110                                           | 300                                                  | 464220                                                       |
| Xinjiang       | 56540                                          | 791                                                  | 109340                                                       |
| Yunnan         | 15020                                          | 49298                                                | 208890                                                       |
| Zhejiang       | 18110                                          | 49                                                   | 132330                                                       |
| Chongqing      | 7750                                           | 8690                                                 | 60490                                                        |
